# Supplementary material for: El mensaje liberador de Dioniso en las Bacantes de Eurípides
Source: MDPI journal article supplement (doi:10.3390/ijms25084384), 2004-01-01
Supplement: s1 [file s1]

**Table S1.** Characteristics of recombinant plasmids containing fusion genes encoding recombinant chimeric proteins.

| Recombinant plasmid   | Plasmid size [bp] | Gene fragment                                                                                                                                                                                                                      | Additional gene fragment | Encoding amino acid residues | GenBank Accession No. | Nucleotide                                 |
|-----------------------|-------------------|------------------------------------------------------------------------------------------------------------------------------------------------------------------------------------------------------------------------------------|--------------------------|------------------------------|-----------------------|--------------------------------------------|
| pET30/SAG1-SAG2-AMA1  | 8163              | <i>sag1</i> (amino acid residues from 49-310); GeneBank Accession No. S76248.1; nucleotide from 453-1244<br><i>sag2</i> (amino acid from 30-170); GeneBank Accession No. M33572.1; nucleotide from 269-691*/ 269-692**/ 269-693*** | <i>ama1</i>              | from 67-568                  | XM_002364813.1        | 727-2232                                   |
| pET30/SAG1-SAG2-AMA1S | 7908              |                                                                                                                                                                                                                                    | <i>ama1</i>              | from 67-483                  | XM_002364813.1        | 728-1979                                   |
| pET30/SAG1-SAG2-GRA1  | 7158              |                                                                                                                                                                                                                                    | <i>gra1</i>              | from 24-190                  | M26007.1              | 681-1181                                   |
| pET30/SAG1-SAG2-GRA2  | 7062              |                                                                                                                                                                                                                                    | <i>gra2</i>              | from 51-185                  | M99392.1              | 1128-1532                                  |
| pET30/SAG1-SAG2-GRA5  | 6942              |                                                                                                                                                                                                                                    | <i>gra5</i>              | from 26-120                  | L06091.1              | 391-675                                    |
| pET30/SAG1-SAG2-GRA6  | 7257              |                                                                                                                                                                                                                                    | <i>gra6</i>              | from 30-228                  | L33814.1              | 506-1106                                   |
| pET30/SAG1-SAG2-GRA7  | 7287              |                                                                                                                                                                                                                                    | <i>gra7</i>              | from 27-236                  | Y13863.1              | 156-785                                    |
| pET30/SAG1-SAG2-GRA9  | 7551              |                                                                                                                                                                                                                                    | <i>gra9</i>              | from 21-318                  | AY371455.1            | 2148-2498 and 3116-3658                    |
| pET30/SAG1-SAG2-LDH2  | 7632              |                                                                                                                                                                                                                                    | <i>ldh2</i>              | from 2-326                   | XM_002368447.2        | 909-1884                                   |
| pET30/SAG1-SAG2-MAG1  | 7926              |                                                                                                                                                                                                                                    | <i>mag1</i>              | from 30-452                  | XM_002365659.1        | 374-1643                                   |
| pET30/SAG1-SAG2-MAG1S | 7236              |                                                                                                                                                                                                                                    | <i>mag1s</i>             | from 30-222                  | XM_002365659.1        | 374-954                                    |
| pET30/SAG1-SAG2-MIC1  | 7953              |                                                                                                                                                                                                                                    | <i>mic1</i>              | from 25-456                  | Z71786.1              | 216-217, 537-1009, 1401-1479 and 1742-2483 |
| pET30/SAG1-SAG2-MIC1S | 7131              |                                                                                                                                                                                                                                    | <i>mic1ex2</i>           | from 25-182                  | Z71786.1              | 217 and 537-1010                           |
| pET30/SAG1-SAG2-MIC3  | 7536              |                                                                                                                                                                                                                                    | <i>mic3</i>              | from 67-359                  | AJ132530.1            | 894-1772                                   |
| pET30/SAG1-SAG2-P35   | 7716              |                                                                                                                                                                                                                                    | <i>p35</i>               | from 26-377                  | AF310261.1            | 120-1178                                   |
| pET30/SAG1-SAG2-P35S  | 7092              |                                                                                                                                                                                                                                    | <i>p35</i>               | from 26-170                  | AF310261.1            | 121-555                                    |
| pET30/SAG1-SAG2-ROP1  | 7593              |                                                                                                                                                                                                                                    | <i>rop1</i>              | from 85-396                  | M71274.1              | 453-1388                                   |
| pET30/SAG1-SAG2       | 6657              | <i>sag1</i>                                                                                                                                                                                                                        | -                        | from 49-310                  | S76248.1              | 453-1244                                   |
|                       |                   | <i>sag2</i>                                                                                                                                                                                                                        | -                        | from 30-170                  | M33572.1              | 269-692                                    |

Explanation of symbols: \* - in case of pET30/SAG1-SAG2-AMA1N, pET30/SAG1-SAG2-LDH2, pET30/SAG1-SAG2-MIC3, pET30/SAG1-SAG2-ROP1; \*\* - in case of pET30/SAG1-SAG2-AMA1, pET30/SAG1-SAG2-GRA1, pET30/SAG1-SAG2-GRA5, pET30/SAG1-SAG2-GRA6, pET30/SAG1-SAG2-GRA7, pET30/SAG1-SAG2-GRA9, pET30/SAG1-SAG2-MAG1, pET30/SAG1-SAG2-MAG1S, pET30/SAG1-SAG2-MIC1, pET30/SAG1-SAG2-MIC1S, pET30/SAG1-SAG2-P35; \*\*\* - in case of pET30/SAG1-SAG2-GRA2, pET30/SAG1-SAG2-P35S
