# Supplementary material for: El mensaje liberador de Dioniso en las Bacantes de Eurípides
Source: MDPI journal article supplement (doi:10.3390/ijms25084384), 2004-01-01
Supplement: s1 [file s1]

**Table S2.** Characteristics of the single recombinant proteins.

| Recombinant protein | Amino acid residues | Mw [kDa] | pI   | Reference |
|---------------------|---------------------|----------|------|-----------|
| AMA1                | from 67-569         | 61.29    | 5.97 | [1]       |
| AMA1C               | from 287-569        | 35.91    | 5.41 | [1]       |
| AMA1N               | from 67-287         | 32.07    | 8.41 | [1]       |
| BAG1                | from 1-229          | 30.60    | 6.45 | [2]       |
| BSR4                | from 33-356         | 40.40    | 5.90 | [2]       |
| GRA1                | from 24-190         | 24.09    | 4.79 | [3]       |
| GRA2                | from 51-185         | 23.49    | 6.91 | [4]       |
| GRA4                | from 20-279         | 31.87    | 7.22 | [2]       |
| GRA5                | from 26-94          | 15.90    | 6.45 | [5]       |
| GRA6                | from 30-231         | 27.24    | 6.00 | [6]       |
| GRA7                | from 18-236         | 32.60    | 5.77 | [3]       |
| GRA9                | from 21-318         | 38.86    | 5.92 | [2]       |
| LDH1                | from 1-329          | 41.70    | 5.99 | [2]       |
| LDH2                | from 1-326          | 41.50    | 6.25 | [2]       |
| MAG1                | from 30-222         | 23.81    | 4.94 | [7]       |
| MIC1                | from 25-456         | 52.00    | 5.89 | [8]       |
| MIC1ex2             | from 25-182         | 24.50    | 7.79 | [8]       |
| MIC1ex3,4           | from 183-456        | 35.90    | 4.97 | [8]       |
| MIC3                | from 67-359         | 36.52    | 6.45 | [2]       |
| P35                 | from 26-170         | 21.30    | 6.85 | [6]       |
| ROP1                | from 85-396         | 39.11    | 6.66 | [4]       |
| SAG1                | from 49-313         | 33.42    | 6.75 | [3]       |
| SAG2                | from 30-170         | 20.50    | 6.88 | [6]       |
| SAG4                | from 26-150         | 19.24    | 7.61 | [2]       |

#### Reference

1. Ferra, B.; Holec-Gąsior, L.; Gałkowska, J.; Dziadek, B.; Dzitko, K. *Toxoplasma Gondii* Recombinant Antigen AMA1: Diagnostic Utility of Protein Fragments for the Detection of IgG and IgM Antibodies. *Pathogens* **2020**, *9*, doi:10.3390/pathogens9010043.
2. Holec-Gasior, L.; Ferra, B.; Hiszczyńska-Sawicka, E.; Kur, J. The Optimal Mixture of *Toxoplasma Gondii* Recombinant Antigens (GRA1, P22, ROP1) for Diagnosis of Ovine Toxoplasmosis. *Vet Parasitol* **2014**, *206*, 146–152, doi:10.1016/j.vetpar.2014.09.018.
3. Hiszczyńska-Sawicka, E.; Brilowska-Dąbrowska, A.; Dąbrowski, S.; Pietkiewicz, H.; Myjak, P.; Kur, J. High Yield Expression and Single-Step Purification of *Toxoplasma Gondii* SAG1, GRA1, and GRA7 Antigens in *Escherichia Coli*. *Protein Expr Purif* **2003**, *27*, 150–157, doi:10.1016/S1046-5928(02)00593-4.
4. Holec-Gasior, L.; Kur, J.; Hiszczyńska-Sawicka, E. GRA2 and ROP1 Recombinant Antigens as Potential Markers for Detection of *Toxoplasma Gondii*-Specific Immunoglobulin G in Humans with Acute Toxoplasmosis. *Clin Vaccine Immunol* **2009**, *16*, 510–514, doi:10.1128/0140-7841.00341-08.
5. Holec-Gasior, L.; Kur, J. *Toxoplasma Gondii*: Recombinant GRA5 Antigen for Detection of Immunoglobulin G Antibodies Using Enzyme-Linked Immunosorbent Assay. *Exp Parasitol* **2010**, *124*, 272–278, doi:10.1016/J.EXPPARA.2009.10.010.
6. Hiszczyńska-Sawicka, E.; Kur, J.; Pietkiewicz, H.; Holec, L.; Gąsior, A.; Myjak, P. Efficient Production of the *Toxoplasma Gondii* GRA6, P35 and SAG2 Recombinant Antigens and Their Applications in the Serodiagnosis of Toxoplasmosis. *Acta Parasitol* **2005**, *50*, 249–254.

7. Holec, L.; Hiszczyńska-Sawicka, E.; Gasior, A.; Brillowska-Dąbrowska, A.; Kur, J. Use of MAG1 Recombinant Antigen for Diagnosis of *Toxoplasma Gondii* Infection in Humans. *Clin Vaccine Immunol* **2007**, *14*, 220–225, doi:10.1128/CVI.00419-06.
8. Holec, L.; Gasior, A.; Brillowska-Dąbrowska, A.; Kur, J. *Toxoplasma Gondii*: Enzyme-Linked Immunosorbent Assay Using Different Fragments of Recombinant Microneme Protein 1 (MIC1) for Detection of Immunoglobulin G Antibodies. *Exp Parasitol* **2008**, *119*, 1–6, doi:10.1016/j.exppara.2007.12.002.
