# Supplementary material for: El mensaje liberador de Dioniso en las Bacantes de Eurípides
Source: MDPI journal article supplement (doi:10.3390/ijms25084384), 2004-01-01
Supplement: s1 [file s1]

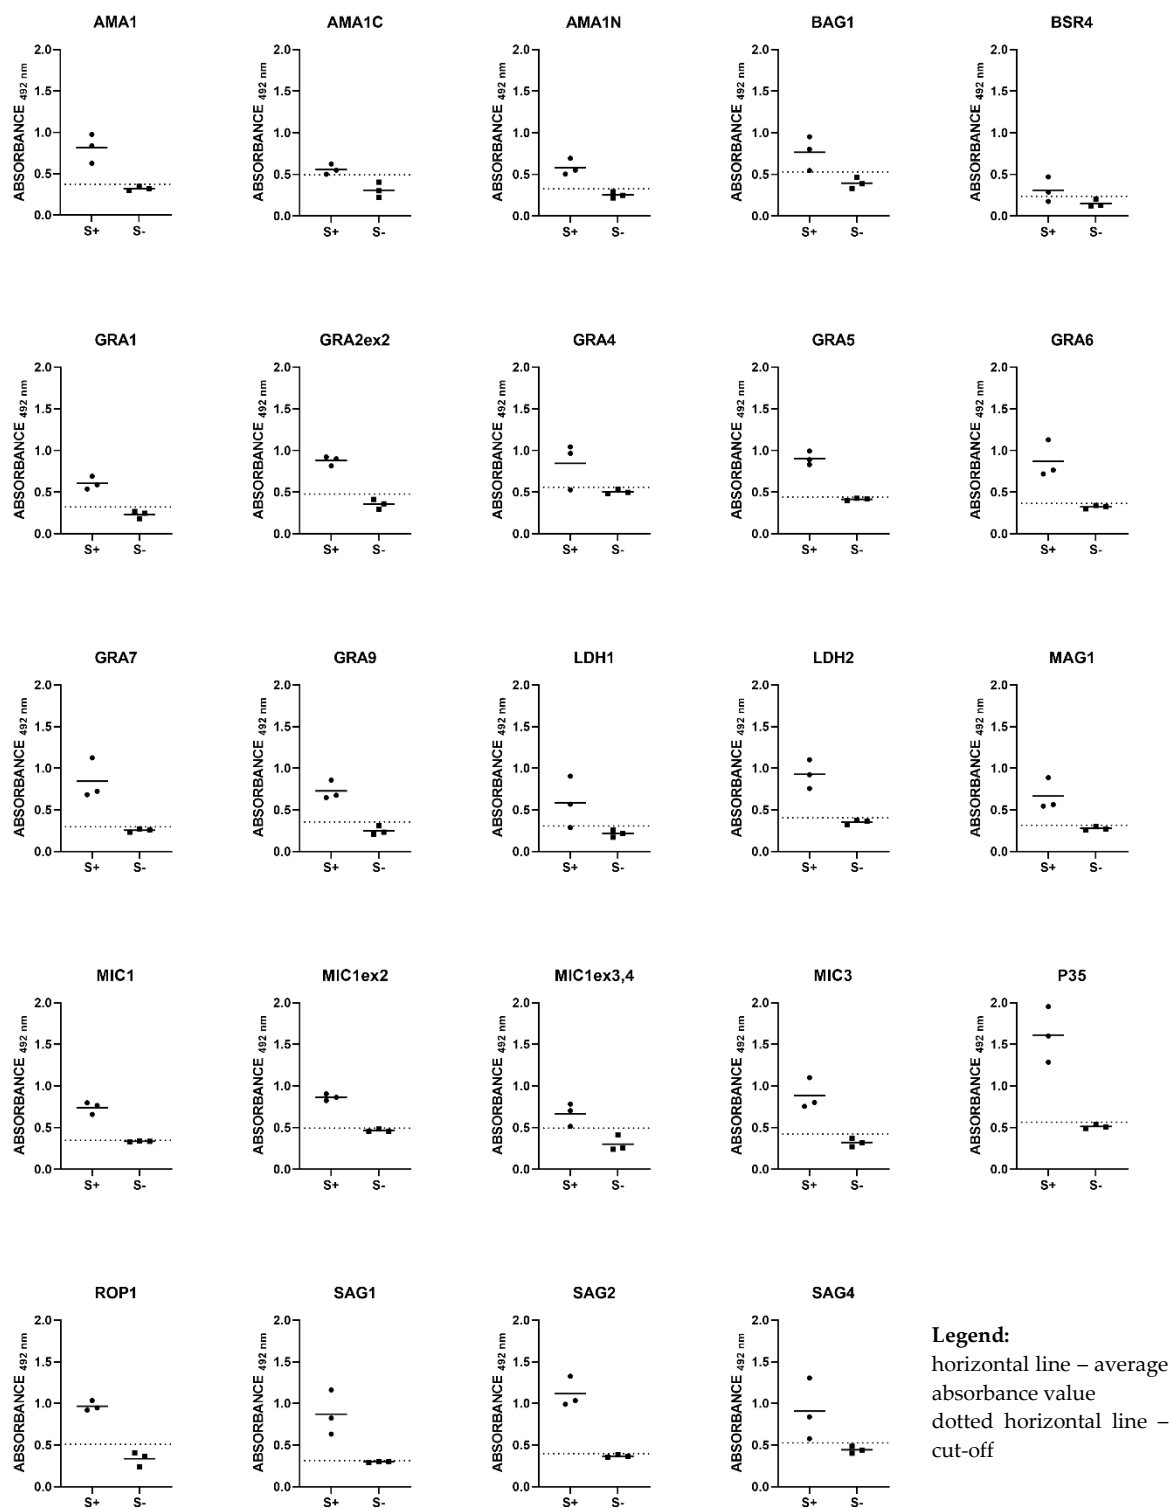

**Figure S2.** Comparison of immunoreactivity in IgG ELISA using single recombinant proteins with 6 ovine serum samples: three from naturally infected sheep (S+) and three from seronegative animals (S-). The secondary antibody dilution used was 1:32 000.
