# Supplementary material for: El mensaje liberador de Dioniso en las Bacantes de Eurípides
Source: MDPI journal article supplement (doi:10.3390/ijms25084384), 2004-01-01
Supplement: s1 [file s1]

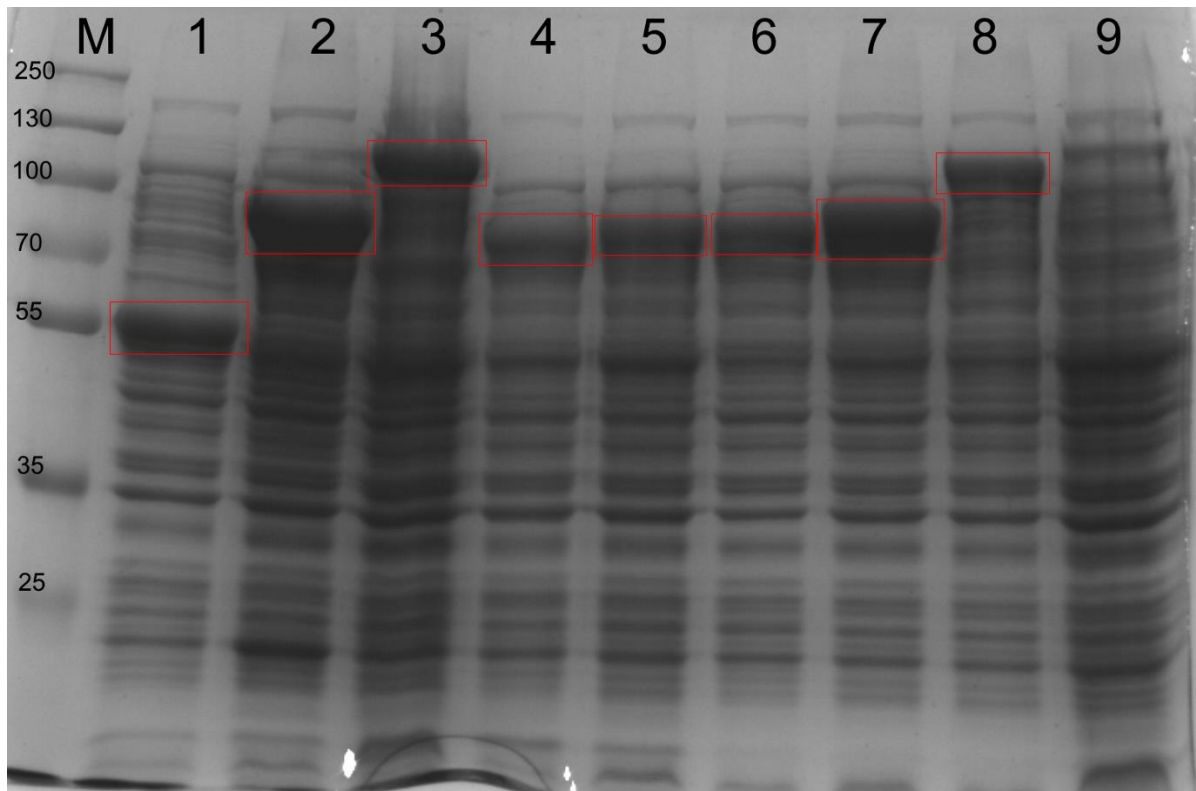

**Figure S5.** Coomassie blue-stained SDS-PAGE (10% polyacrylamide gel) separation of protein lysates.

**Lines:**

M – PageRuler™ Plus Prestained Protein Ladder (Thermo Fisher Scientific, Waltham, MA, USA)

1 – *E. coli* Rosetta(DE3)pLysS+pET30/SAG1-SAG2 cell lysate

2 – *E. coli* Rosetta(DE3)pLysS+pET30/SAG1-SAG2-MIC3 cell lysate

3 – *E. coli* Rosetta(DE3)pLysS+pET30/SAG1-SAG2-AMA1 cell lysate

4 – *E. coli* Rosetta(DE3)pLysS+pET30/SAG1-SAG2-GRA1 cell lysate

5 – *E. coli* Rosetta(DE3)pLysS+pET30/SAG1-SAG2-GRA6 cell lysate

6 – *E. coli* Rosetta(DE3)pLysS+pET30/SAG1-SAG2-GRA7 cell lysate

7 – *E. coli* Rosetta(DE3)pLysS+pET30/SAG1-SAG2-GRA9 cell lysate

8 – *E. coli* Rosetta(DE3)pLysS+pET30/SAG1-SAG2-MIC1 cell lysate

9 – *E. coli* Rosetta(DE3)pLysS+pET30 Ek/LIC cell lysate (negative control)
