# Supplementary material for: El mensaje liberador de Dioniso en las Bacantes de Eurípides
Source: MDPI journal article supplement (doi:10.3390/ijms25084384), 2004-01-01
Supplement: s1 [file s1]

**Figure S6.** Amino acid sequences of recombinant chimeric proteins

**SAG1-SAG2 (SAG1 49-310 AA; SAG2 30-170 AA)**

```

1  MHHHHHHSSG LVPRGSGMKE TAAAKFERQH MDSPDPDPPL VANQVVTCPD KKSTAAVILT
61 PTENHFTLKC PKTALTEPPT LAYSPNRQIC PAGTTSSCTS KAVTLSSLIP EAEDSWWTGD
121 SASLDTAGIK LTVPIEKFPV TTQTFVVGCI KGDDAQSCMV TVTVQARASS VVNNVARCSY
181 GADSTLGPVK LSAEGPTTMT LVCGKDGKVK PQDNNQYCSG TTLTGCNEKS FKDILPKLTE
241 NPWQGNASSD KGATLTIKKE AFPAESKSVI IGCTGGSPEK HHCTVKLEFA GAAGSAKSAE
301 TPAPIECTAG ATKTVDAPSS GSVVFQCGDK LTISPSGEGD VFYGKECTDS RKLTTVLPGA
361 VLTAKVQOPA KGPATYTLSY DGTPEKPQVL CYKCVAEAGA PAGRNNDGSS APTPKDCKLI
421 VRVPADGRV TSGFDPVSLT DLGTDDDDKS PGFSSTMAIS DPNSSSVDKL AAALEHHHHH
481 H

```

**SAG1-SAG2-AMA1 (SAG1 49-310 AA; SAG2 30-170 AA; AMA1 67-568 AA)**

```

1  MHHHHHHSSG LVPRGSGMKE TAAAKFERQH MDSPDPDPPL VANQVVTCPD KKSTAAVILT
61 PTENHFTLKC PKTALTEPPT LAYSPNRQIC PAGTTSSCTS KAVTLSSLIP EAEDSWWTGD
121 SASLDTAGIK LTVPIEKFPV TTQTFVVGCI KGDDAQSCMV TVTVQARASS VVNNVARCSY
181 GADSTLGPVK LSAEGPTTMT LVCGKDGKVK PQDNNQYCSG TTLTGCNEKS FKDILPKLTE
241 NPWQGNASSD KGATLTIKKE AFPAESKSVI IGCTGGSPEK HHCTVKLEFA GAAGSAKSAE
301 TPAPIECTAG ATKTVDAPSS GSVVFQCGDK LTISPSGEGD VFYGKECTDS RKLTTVLPGA
361 VLTAKVQOPA KGPATYTLSY DGTPEKPQVL CYKCVAEAGA PAGRNNDGSS APTPKDCKLI
421 VRVPADGRV TSGFDPVSLT DLGTDDDDKS PGFSSTMAIT SGNPFQANVE MKTFMERFNL
481 THHHQSGIYV DLGQDKEVDG TLYREPAGLC PIWGKHIELQ QPDRPPYRNN FLEDVPTKE
541 YKQSGNPLPG GFNLNFVTPS GQRISPFPM LLEKNSNIKA STDLGRCAEF AFKTVAMDKN
601 NKATKYRYPF VYDSKKRLCH ILYVSMQLME GKKYCSVKGE PPDLTWYCFK PRKSVTENHH
661 LIYGSAYVGE NPDAFISKCP NQALRGYRFG VWKKGRCLDY TELTDTVIER VESKAQCWVK
721 TFENDGVASD QPHTYPLTSQ ASWNDWWPLH QSDQPHSGGV GRNYGFYYVD TTGEGKCAL
781 DQVPDCLVSD SAAVSYTAAG SLSEETPNFI IPSNPSVTPP TPETALQCTA DKFPDSFGAC
841 DVQACKRQKT SCVGGQIQST SVDCTADEQN ECGSNTALIA GLAVGGVLLL ALLGGGCYFA
901 KRLDRNKGVO AAHHEHEFQS DRGARKRPS DLMQEAEPST WDEAEENIEQ DGETHVMVEG
961 ESDPNSSSV D KLAAALEHHH HHH

```

**SAG1-SAG2-AMA1S (SAG1 49-310 AA; SAG2 30-170 AA; AMA1N 67-483 AA)**

```

1  MHHHHHHSSG LVPRGSGMKE TAAAKFERQH MDSPDPDPPL VANQVVTCPD KKSTAAVILT
61 PTENHFTLKC PKTALTEPPT LAYSPNRQIC PAGTTSSCTS KAVTLSSLIP EAEDSWWTGD
121 SASLDTAGIK LTVPIEKFPV TTQTFVVGCI KGDDAQSCMV TVTVQARASS VVNNVARCSY
181 GADSTLGPVK LSAEGPTTMT LVCGKDGKVK PQDNNQYCSG TTLTGCNEKS FKDILPKLTE
241 NPWQGNASSD KGATLTIKKE AFPAESKSVI IGCTGGSPEK HHCTVKLEFA GAAGSAKSAE
301 TPAPIECTAG ATKTVDAPSS GSVVFQCGDK LTISPSGEGD VFYGKECTDS RKLTTVLPGA
361 VLTAKVQOPA KGPATYTLSY DGTPEKPQVL CYKCVAEAGA PAGRNNDGSS APTPKDCKLI
421 VRVPADGRV TSGFDPVSLT TSGNPFQANV EMKTFMERFN LTHHHQSGIY VDLGQDKEVD
481 GTLYREPAGL CPIWGKHIEL QPDRPPYRN NFLEDVPTKE EYKQSGNPLP GGFNLNFVTP
541 SGQRISPFPM ELLEKNSNIK ASTDLGRCAE FAFKTVAMDK NNKATKYRYP FVYDSKKRLC
601 HILYVSMQLM EGKKYCSVKG EPPDLTWYCF KPRKSVTENH HLIYGSAYVG ENPDAFISK
661 PNQALRGYRF GVWKKGRCLD YTELTDTVIE RVESKAQCWV KTFENDGVAS DQPHTYPLTS
721 QASWNDWWPL HQSDQPHSGG VGRNYGFYYV DTTGEGKCAL SDQVPDCLVS DSAAVSYTAA
781 GSLSEETPNF IIPSNPSVTP PTPETALQCT ADKFPDSFGA CDVQACKRQK TSCVGGQIQS
841 TSVDCTADEQ NECGSNTDLG TDDDDKSPGF SSTMAISDPN SSSVDKLAAL LEHHHHHH

```

**SAG1-SAG2-GRA1 (SAG1 49-310 AA; SAG2 30-170 AA; GRA1 24-190 AA)**

```

1  MHHHHHHSSG LVPRGSGMKE TAAAKFERQH MDSPDPDPPL VANQVVTCPD KKSTAAVILT
61 PTENHFTLKC PKTALTEPPT LAYSPNRQIC PAGTTSSCTS KAVTLSSLIP EAEDSWWTGD
121 SASLDTAGIK LTVPIEKFPV TTQTFVVGCI KGDDAQSCMV TVTVQARASS VVNNVARCSY
181 GADSTLGPVK LSAEGPTTMT LVCGKDGKVK PQDNNQYCSG TTLTGCNEKS FKDILPKLTE
241 NPWQGNASSD KGATLTIKKE AFPAESKSVI IGCTGGSPEK HHCTVKLEFA GAAGSAKSAE

```

301 TPAPIECTAG ATKTVDAPSS GSVVFQCGDK LTISPSGEGD VFYGKECTDS RKLTTVLPGA  
 361 VLTAKVQOPA KGPATYTLSY DGTPEKPQVL CYKCVAEAGA PAGRNNDGSS APTPKDCKLI  
 421 VRVPAGADGRV TSGFDPVSLT DLGTDDDDKS PGFSSDMAIA AEGGDNQSSA VSDRASLFLGL  
 481 LSGGTGQGLG IGESVDLEMM GNTYRVERPT GNPDLLKIAI KASDGSYSEV GNVNVVEEVID  
 541 TMKSMQRDED IFLRALNKGE TVEEAIEDVA QAEGLNSEQT LQLEDAVSAV ASVVQDEMKV  
 601 IDDVQOLEKD KQQLKDDIGF LTGERESDPN SSSVDKLAAA LEHHHHHH

SAG1-SAG2-GR2 (SAG1 49-310 AA; SAG2 30-170 AA; GR2 51-185 AA)

1 MHHHHHHSSG LVPRGSGMKE TAAAKFERQH MDSPDPDPPL VANQVVTCPD KKSTAAVILT  
 61 PTENHFTLKC PKTALTEPPT LAYSPNRQIC PAGTTSSCTS KAVTLSSLIP EAEDSWWTGD  
 121 SASLDTAGIK LTVPIEKFPV TTQTFVVGCI KGDDAQSCMV TVTVQARASS VVNNVARCSY  
 181 GADSTLGPVK LSAEGPTTMT LVCCKDGVKV PQDNNQYCSG TTLTGCNEKS FKDILPKLTE  
 241 NPWQGNASSD KGATLTIKKE AFPAESKSVI IGCTGGSPEK HHCTVKLEFA GAAGSAKSAE  
 301 TPAPIECTAG ATKTVDAPSS GSVVFQCGDK LTISPSGEGD VFYGKECTDS RKLTTVLPGA  
 361 VLTAKVQOPA KGPATYTLSY DGTPEKPQVL CYKCVAEAGA PAGRNNDGSS APTPKDCKLI  
 421 VRVPAGADGRV TSGFDPVSLT GKGEHTPPLP DERQQEPEEP VSQRASRAE QLFRKFLKFA  
 481 ENVGHHSEKA FKKAKVVAEK GFTAAKTHTV RGFKVAKEAA GRGMVTVGKK LANVESDRST  
 541 TTTQAPDSPN GLAETEVPVE PQQRAAHVPV PDFSQDLGTD DDDKSPGFSS TMAISDPNSS  
 601 SVDKLAAALE HHHHHH

SAG1-SAG2-GR5 (SAG1 49-310 AA; SAG2 30-170 AA; GR5 26-120 AA)

1 MHHHHHHSSG LVPRGSGMKE TAAAKFERQH MDSPDPDPPL VANQVVTCPD KKSTAAVILT  
 61 PTENHFTLKC PKTALTEPPT LAYSPNRQIC PAGTTSSCTS KAVTLSSLIP EAEDSWWTGD  
 121 SASLDTAGIK LTVPIEKFPV TTQTFVVGCI KGDDAQSCMV TVTVQARASS VVNNVARCSY  
 181 GADSTLGPVK LSAEGPTTMT LVCCKDGVKV PQDNNQYCSG TTLTGCNEKS FKDILPKLTE  
 241 NPWQGNASSD KGATLTIKKE AFPAESKSVI IGCTGGSPEK HHCTVKLEFA GAAGSAKSAE  
 301 TPAPIECTAG ATKTVDAPSS GSVVFQCGDK LTISPSGEGD VFYGKECTDS RKLTTVLPGA  
 361 VLTAKVQOPA KGPATYTLSY DGTPEKPQVL CYKCVAEAGA PAGRNNDGSS APTPKDCKLI  
 421 VRVPAGADGRV TSGFDPVSLT DLGTDDDDKS PGFSSDMAIG STRDVGSGGD DSEGARGREQ  
 481 QQVQQHEQNE DRSLFERGRA AVTGHPVRTA VGLAAAVVAV VSLRLRLKRR RRAIQEESK  
 541 ESATAEEEEV AEEESDPNSS SVDKLAAALE HHHHHH

SAG1-SAG2-GR6 (SAG1 49-310 AA; SAG2 30-170 AA; GR6 30-228 AA)

1 MHHHHHHSSG LVPRGSGMKE TAAAKFERQH MDSPDPDPPL VANQVVTCPD KKSTAAVILT  
 61 PTENHFTLKC PKTALTEPPT LAYSPNRQIC PAGTTSSCTS KAVTLSSLIP EAEDSWWTGD  
 121 SASLDTAGIK LTVPIEKFPV TTQTFVVGCI KGDDAQSCMV TVTVQARASS VVNNVARCSY  
 181 GADSTLGPVK LSAEGPTTMT LVCCKDGVKV PQDNNQYCSG TTLTGCNEKS FKDILPKLTE  
 241 NPWQGNASSD KGATLTIKKE AFPAESKSVI IGCTGGSPEK HHCTVKLEFA GAAGSAKSAE  
 301 TPAPIECTAG ATKTVDAPSS GSVVFQCGDK LTISPSGEGD VFYGKECTDS RKLTTVLPGA  
 361 VLTAKVQOPA KGPATYTLSY DGTPEKPQVL CYKCVAEAGA PAGRNNDGSS APTPKDCKLI  
 421 VRVPAGADGRV TSGFDPVSLT DLGTDDDDKS PGFSSDMAIM GVLVNSLGGV RVAADSGGVK  
 481 QTPSETGSSG GQQEAVGTTE DYVNSSAMGG GQGDSLAEDD TTSEAAEGDV DFPFVLANEG  
 541 KSEARGPSLE ERIEEQGTRR RYSSVQEPQA KVPCKRTQKR HRLIGAVVLA VSVAMLTAFF  
 601 LRRTGRRSPQ EPSGDGGGND AGNNAGNGGN EGRGYGGRGE GGAEDDRRPL HPERVNVFES  
 661 DPNSSSVDKL AAALHHHHHH H

SAG1-SAG2-GR7 (SAG1 49-310 AA; SAG2 30-170 AA; GR7 27-236 AA)

1 MHHHHHHSSG LVPRGSGMKE TAAAKFERQH MDSPDPDPPL VANQVVTCPD KKSTAAVILT  
 61 PTENHFTLKC PKTALTEPPT LAYSPNRQIC PAGTTSSCTS KAVTLSSLIP EAEDSWWTGD  
 121 SASLDTAGIK LTVPIEKFPV TTQTFVVGCI KGDDAQSCMV TVTVQARASS VVNNVARCSY  
 181 GADSTLGPVK LSAEGPTTMT LVCCKDGVKV PQDNNQYCSG TTLTGCNEKS FKDILPKLTE  
 241 NPWQGNASSD KGATLTIKKE AFPAESKSVI IGCTGGSPEK HHCTVKLEFA GAAGSAKSAE  
 301 TPAPIECTAG ATKTVDAPSS GSVVFQCGDK LTISPSGEGD VFYGKECTDS RKLTTVLPGA  
 361 VLTAKVQOPA KGPATYTLSY DGTPEKPQVL CYKCVAEAGA PAGRNNDGSS APTPKDCKLI  
 421 VRVPAGADGRV TSGFDPVSLT DLGTDDDDKS PGFSSTMAMA TASDDELMR IRNSDFFDGQ  
 481 APVDSLRTN AGVDSKGTDD HLTTSMDKAS VESQLPRREP LETEPDEQEE VHFRKRGVRS

541 DAEVTDDNIY EEHTDRKVVP RKSEGKRSFK DLLKKLALPA VGMGASYFAA DRLVPELTEE  
601 QQRGDEPLTT GQNVGTVLGF AALAAAAAFL GMGLTRTYRH FSPRKNRSRQ PALEQEVPEP  
661 GEDGEDARQS DPNSSSVDKL AAALHHHHH H

SAG1-SAG2-GRA9 (SAG1 49-310 AA; SAG2 30-170 AA; GRA9 21-318 AA)

1 MHHHHHHSSG LVPRGSGMKE TAAAKFERQH MDSPDPDPPL VANQVVTCPD KKSTAAVILT  
61 PTENHFTLKC PKTALTEPPT LAYSPNRQIC PAGTTSSCTS KAVTLSSLIP EAEDSWWTGD  
121 SASLDTAGIK LTVPIEKFPV TTQTFVVGCI KGDDAQSCMV TVTVQARASS VVNNVARCSY  
181 GADSTLGPVK LSAEGPTTMT LVCGKDGKVK PQDNNQYCSG TTLTGCNEKS FKDILPKLTE  
241 NPWQGNASSD KGATLTIKKE AFPAESKSVI IGCTGGSPEK HHCTVKLEFA GAAGSAKSAE  
301 TPAPIECTAG ATKTVDAPSS GSVVFQCGDK LTISPSGEGD VFYGKECTDS RKLTTVLPGA  
361 VLTAKVQOPA KGPATYTLSY DGTPEKPQVL CYKCVAEAGA PAGRNNDGSS APTPKDCKLI  
421 VRVPGADGRV TSGFDPVSLT DLGTDDDDKS PGFSSTMAIL DLFLGESGVY LFGKASESDV  
481 ALKVPEDPVP EEPRREPEKH VDLFGEDWKQ FGGSGFGDFS KVEFENLFSQ VHEMMRRLMG  
541 RGADGFGPSL LGDSPGFHFP RLRALQPKTK LEKTGTCQYV VTWAEVTAE NVRVILHLQR  
601 RQVEVQYRAA TRRDEKTEGG ESHSMSKEQS SQLMSVDPQC IMTREVVAQK LAGWTDNTHT  
661 ATAGTPKKLL ISFPSPDHIK EMVKEGYLPD NALERVLAGD FEGFSRTQMC LVSGRNRTEC  
721 AFAEQEVEL EEKPLPSDSS PVTSELPRIL SQEDRGLSDP NSSSVDKLAA ALEHHHHHH

SAG1-SAG2-LDH2 (SAG1 49-310 AA; SAG2 30-170 AA; LDH2 2-326 AA)

1 MHHHHHHSSG LVPRGSGMKE TAAAKFERQH MDSPDPDPPL VANQVVTCPD KKSTAAVILT  
61 PTENHFTLKC PKTALTEPPT LAYSPNRQIC PAGTTSSCTS KAVTLSSLIP EAEDSWWTGD  
121 SASLDTAGIK LTVPIEKFPV TTQTFVVGCI KGDDAQSCMV TVTVQARASS VVNNVARCSY  
181 GADSTLGPVK LSAEGPTTMT LVCGKDGKVK PQDNNQYCSG TTLTGCNEKS FKDILPKLTE  
241 NPWQGNASSD KGATLTIKKE AFPAESKSVI IGCTGGSPEK HHCTVKLEFA GAAGSAKSAE  
301 TPAPIECTAG ATKTVDAPSS GSVVFQCGDK LTISPSGEGD VFYGKECTDS RKLTTVLPGA  
361 VLTAKVQOPA KGPATYTLSY DGTPEKPQVL CYKCVAEAGA PAGRNNDGSS APTPKDCKLI  
421 VRVPGADGRV TSGFDPVSLT TGTVSRRKKI AMIGSGMIGG TMGYLCVLRE LADVVLFDVV  
481 TGMPEGKALD DSQATSIADT NVSVTSANQY EKIAGSDVVI ITAGLTKVPG KSDKEWSRND  
541 LLPFNAKIIR EVAQGVKKYC PLAFVIVVTN PLDCMVKCFH EASGLPKNMV CGMANVLDSA  
601 RFRRFIADQL EISPRDIQAT VIGTHGDHML PLARYVTVNG FPLREFIKKG KMTEAKLAEI  
661 VERTKKAGGE IVRLLGQGSA YYAPALSAIT MAQAFKDEK RVLPCSVYQ GEYGLHDMFI  
721 GLPAVIGGGG IEQVIELELT HEEQECFRKS VDDVVELNKS LAALGDLGTD DDDKSPGFSS  
781 TMAISDPNSS SVDKLAAALE HHHHHH

SAG1-SAG2-MAG1 (SAG1 49-310 AA; SAG2 30-170 AA; MAG1 30-452 AA)

1 MHHHHHHSSG LVPRGSGMKE TAAAKFERQH MDSPDPDPPL VANQVVTCPD KKSTAAVILT  
61 PTENHFTLKC PKTALTEPPT LAYSPNRQIC PAGTTSSCTS KAVTLSSLIP EAEDSWWTGD  
121 SASLDTAGIK LTVPIEKFPV TTQTFVVGCI KGDDAQSCMV TVTVQARASS VVNNVARCSY  
181 GADSTLGPVK LSAEGPTTMT LVCGKDGKVK PQDNNQYCSG TTLTGCNEKS FKDILPKLTE  
241 NPWQGNASSD KGATLTIKKE AFPAESKSVI IGCTGGSPEK HHCTVKLEFA GAAGSAKSAE  
301 TPAPIECTAG ATKTVDAPSS GSVVFQCGDK LTISPSGEGD VFYGKECTDS RKLTTVLPGA  
361 VLTAKVQOPA KGPATYTLSY DGTPEKPQVL CYKCVAEAGA PAGRNNDGSS APTPKDCKLI  
421 VRVPGADGRV TSGFDPVSLT DLGTDDDDKS PGFSSTMAMS QRVPELPEVE SFDEVGTGAR  
481 RSGSIATLLP QDAVLYENSE DVAVPSDSAS TPSYFHVESP SASVEAATGA VGEVVPDCEE  
541 QQEQGDTTLLS DHDFHSGGTE QEGLPETEVA HQHETEEQYG TEGMPPPVLP PAPVVHPRFI  
601 AVPGPSVPVP FFSLPDIHPD QVVYILRVQG SGDFDISFEV GRAVKQLEAI KKAYREATGK  
661 LEADELESER GPAVSPRRRL VDLIKDNQRR LRAALQIKI QKKLEEIDDL LQLTRALKAM  
721 DARLRACQDM APIEEALCHK TKAFGEMVSQ KAKEIREKAA SLSSLLGVDA VEKQLRRVEP  
781 EHEDNTRVEA RVEELQKALE KAASEAKQLV GTAAGEIEEG VKADTQAVQD SSKDVLTKSQ  
841 LALVEAFKAI QRALLEAKTK ELVEPTSKEA EEARQILAEQ AASDPNSSSV DKLAAALEHH  
901 HHHH

SAG1-SAG2-MAG1S (SAG1 49-310 AA; SAG2 30-170 AA; MAG1S 30-222 AA)

1 MHHHHHHSSG LVPRGSGMKE TAAAKFERQH MDSPDPDPPL VANQVVTCPD KKSTAAVILT  
61 PTENHFTLKC PKTALTEPPT LAYSPNRQIC PAGTTSSCTS KAVTLSSLIP EAEDSWWTGD

121 SASLDTAGIK LTVPIEKFPV TTQTFVVGCI KGDDAQSCMV TVTVQARASS VVNNVARCSY  
 181 GADSTLGPVK LSAEGPTTMT LVCCKDGVKV PQDNNQYCSG TTLTGCNEKS FKDILPKLTE  
 241 NPWQGNASSD KGATLTIKKE AFPAESKSVI IGCTGGSPEK HHCTVKLEFA GAAGSAKSAE  
 301 TPAPIECTAG ATKTVDAPSS GSVVFQCGDK LTISPSGEGD VFYGKECTDS RKLTTVLPGA  
 361 VLTAKVQOPA KGPATYTLSY DGTPEKPQVL CYKCVAEAGA PAGRNNDGSS APTPKDCKLI  
 421 VRVPGADGRV TSGFDPVSLT DLGTDDDDKS PGFSSTMAMS QRVPELPEVE SFDEVGTGAR  
 481 RSGSIATLLP QDAVLYENSE DVAVPSDSAS TPSYFHVESP SASVEAATGA VGEVVPDCEE  
 541 QQEQGDTTLLS DHDFHSGGTE QEGLPETEVA HQHETEEQYG TEGMPPPVLP PAPVVHPRFI  
 601 AVPGPSVPVP FFSLPDIHPD QVVYILRVQG SGDFDISFEV GRAVKQLEAI KKSDPNSSSV  
 661 DKLAAALEHH HHHH

SAG1-SAG2-MIC1 (SAG1 49-310 AA; SAG2 30-170 AA; MIC1 25-456 AA)

1 MHHHHHHSSG LVPRGSGMKE TAAAKFERQH MDSPDPDPPL VANQVVTCPD KKSTAAVILT  
 61 PTENHFTLKC PKTALTEPPT LAYSPNRQIC PAGTTSSCTS KAVTLSSLIP EAEDSWWTGD  
 121 SASLDTAGIK LTVPIEKFPV TTQTFVVGCI KGDDAQSCMV TVTVQARASS VVNNVARCSY  
 181 GADSTLGPVK LSAEGPTTMT LVCCKDGVKV PQDNNQYCSG TTLTGCNEKS FKDILPKLTE  
 241 NPWQGNASSD KGATLTIKKE AFPAESKSVI IGCTGGSPEK HHCTVKLEFA GAAGSAKSAE  
 301 TPAPIECTAG ATKTVDAPSS GSVVFQCGDK LTISPSGEGD VFYGKECTDS RKLTTVLPGA  
 361 VLTAKVQOPA KGPATYTLSY DGTPEKPQVL CYKCVAEAGA PAGRNNDGSS APTPKDCKLI  
 421 VRVPGADGRV TSGFDPVSLT DLGTDDDDKS PGFSSTMAIA SHSHSPASGR YIQQMLDQRC  
 481 QEIAAELCQS GLRKMCPVPS RIVARNAVGI THQNTLQWRC FDTASLLESN QENNGVNCVD  
 521 DCGHTIPCPG GVHRQNSNHA TRHEILSKLV EEGVQRFCS YQASANKYCN DKFPGTIARR  
 581 SKGFGNNVEV AWRCYEKASL LYSVYAEAS NCGTTWYCPG GRRGTSTELD KRHYTEEEGI  
 641 RQAIGSVDSP CSEVEVCLPK DENPPLCLDE SGQISRTGGG PPSQPPEMQQ PADRSDERGG  
 701 GKEQSPGGEA QPDHPTKGGN IDLPEKSTSP EKTpkTEIHG DSTKATLEEG QQLTLTFIST  
 761 KLDVAVGSCH SLVANFLDGF LKFQTSNSA FDVVEVEEPA GPAVLITGLG HKGRLAVVLD  
 821 YTRLNAAALGS AAYVVEDSGC SSSEEVSFQG VGSGATLVVT TLGESPTAVS ASDPNSSSV  
 881 KLAAALEHHH HHH

SAG1-SAG2-MIC1ex2 (SAG1 49-310 AA; SAG2 30-170 AA; MIC1ex2 25-182 AA)

1 MHHHHHHSSG LVPRGSGMKE TAAAKFERQH MDSPDPDPPL VANQVVTCPD KKSTAAVILT  
 61 PTENHFTLKC PKTALTEPPT LAYSPNRQIC PAGTTSSCTS KAVTLSSLIP EAEDSWWTGD  
 121 SASLDTAGIK LTVPIEKFPV TTQTFVVGCI KGDDAQSCMV TVTVQARASS VVNNVARCSY  
 181 GADSTLGPVK LSAEGPTTMT LVCCKDGVKV PQDNNQYCSG TTLTGCNEKS FKDILPKLTE  
 241 NPWQGNASSD KGATLTIKKE AFPAESKSVI IGCTGGSPEK HHCTVKLEFA GAAGSAKSAE  
 301 TPAPIECTAG ATKTVDAPSS GSVVFQCGDK LTISPSGEGD VFYGKECTDS RKLTTVLPGA  
 361 VLTAKVQOPA KGPATYTLSY DGTPEKPQVL CYKCVAEAGA PAGRNNDGSS APTPKDCKLI  
 421 VRVPGADGRV TSGFDPVSLT ASHSHSPASG RYIQQMLDQR CQEIAAELCQ SGLRKMCPVPS  
 481 SRIVARNAVGI ITHQNTLQWR CFDTASLLES NQENNGVNCV DDCGHTIPCP GGVHRQNSNH  
 541 ATRHEILSKL VEEGVQRFCS PYQASANKYC NDKFPGTIAR RSKGFGNNVE VAWRCYEKDL  
 601 GTDDDDKSPG FSSTMAISDP NSSSVDKLAA ALEHHHHHHH

SAG1-SAG2-MIC3 (SAG1 49-310 AA; SAG2 30-170 AA; MIC3 67-359 AA)

1 MHHHHHHSSG LVPRGSGMKE TAAAKFERQH MDSPDPDPPL VANQVVTCPD KKSTAAVILT  
 61 PTENHFTLKC PKTALTEPPT LAYSPNRQIC PAGTTSSCTS KAVTLSSLIP EAEDSWWTGD  
 121 SASLDTAGIK LTVPIEKFPV TTQTFVVGCI KGDDAQSCMV TVTVQARASS VVNNVARCSY  
 181 GADSTLGPVK LSAEGPTTMT LVCCKDGVKV PQDNNQYCSG TTLTGCNEKS FKDILPKLTE  
 241 NPWQGNASSD KGATLTIKKE AFPAESKSVI IGCTGGSPEK HHCTVKLEFA GAAGSAKSAE  
 301 TPAPIECTAG ATKTVDAPSS GSVVFQCGDK LTISPSGEGD VFYGKECTDS RKLTTVLPGA  
 361 VLTAKVQOPA KGPATYTLSY DGTPEKPQVL CYKCVAEAGA PAGRNNDGSS APTPKDCKLI  
 421 VRVPGADGRV TSGFDPVSLT SPSKQETQLC AISSEGKPCR NRQLHTDNGY FIGASCPKSA  
 481 CCSKTMCGPG GCGEFCSSNW IFCSSSLIYH PDKSYGGDCS CEKQGHRC DK NAECVENLDA  
 541 GGGVHCKCKD GFVGTGLTCS EDPCSKRGNA KCGPNGTCIV VDSVSYTCTC GDGETLVNLP  
 601 EGGQGCKRTG CHAFRENCSP GRCIDDASHE NGYTCECPTG YSREVTSKAE ESCVEGVEVT  
 661 LAEKCEKEFG ISASSCKCDN GYSGSASATS HHGKGESGSE GSLSEKMNI V FKCPSGYHPR  
 721 YHAHTVTCEK IKQDLGTDD DKSPGFSSTM AISDPNSSSV DKLAAALEHH HHHH

SAG1-SAG2-P35 (SAG1 49-310 AA; SAG2 30-170 AA; P35 26-377 AA)

```

1  MHHHHHHSSG LVPRGSGMKE TAAAKFERQH MDSPDPDPPL VANQVVTCPD KKSTAAVILT
61 PTENHFTLKC PKTALTEPPT LAYSPNRQIC PAGTTSSCTS KAVTLSSLIP EAEDSWWTGD
121 SASLDTAGIK LTVPIEKFPV TTQTFVVGCI KGDDAQSCMV TVTVQARASS VVNNVARCSY
181 GADSTLGPVK LSAEGPTTMT LVCGKDGKVK PQDNNQYCSG TTLTGCNEKS FKDILPKLTE
241 NPWQGNASSD KGATLTIKKE AFPAESKSVI IGCTGGSPEK HHCTVKLEFA GAAGSAKSAE
301 TPAPIECTAG ATKTVDAPSS GSVVFQCGDK LTISPSGEGD VFYGKECTDS RKLTTVLPGA
361 VLTAKVQOPA KGPATYTLSY DGTPEKPQVL CYKCVAEAGA PAGRNNDGSS APTPKDCKLI
421 VRVPAGADGRV TSGFDPVSLT DLGTDDDDKS PGFSSTMAIG PLSYHPSSYG ASYPNPSNPL
481 HGMPPKPNPV RPPPPGFHPS VIPNPPYPLG TPAGMPQPEV PPLQHPPPTG SPPAAAPQPP
541 YPVGTPVMPQ PEIPPVHRPP PPGFRPEVAP VPPYPVGTPT GMPQPEIPAV HHPFPYVTTT
601 TTAAPRVLVY KIPYGAAP RAPVPVRPMG PSDISTHVRG AIRRQPGTTT TTTSRKLLFR
661 TAVVAAMAAA LITLFRQRPV FMEGVRMFPN LHMPQPEIPA VHHFPYVTTT TTTAAPRVLV
721 YKIPYGAAP PRAPPVPRM GPSDISTHVR GAIRRQPGTT TTTTSRKLLF RTAVVAAMAA
781 ALITLFRQRP VFMEGVRMFP NLHYRFTVTT QKSDPNSSSV DKLAAALEHH HHHH

```

SAG1-SAG2-P35S (SAG1 49-310 AA; SAG2 30-170 AA; P35S 26-170 AA)

```

1  MHHHHHHSSG LVPRGSGMKE TAAAKFERQH MDSPDPDPPL VANQVVTCPD KKSTAAVILT
61 PTENHFTLKC PKTALTEPPT LAYSPNRQIC PAGTTSSCTS KAVTLSSLIP EAEDSWWTGD
121 SASLDTAGIK LTVPIEKFPV TTQTFVVGCI KGDDAQSCMV TVTVQARASS VVNNVARCSY
181 GADSTLGPVK LSAEGPTTMT LVCGKDGKVK PQDNNQYCSG TTLTGCNEKS FKDILPKLTE
241 NPWQGNASSD KGATLTIKKE AFPAESKSVI IGCTGGSPEK HHCTVKLEFA GAAGSAKSAE
301 TPAPIECTAG ATKTVDAPSS GSVVFQCGDK LTISPSGEGD VFYGKECTDS RKLTTVLPGA
361 VLTAKVQOPA KGPATYTLSY DGTPEKPQVL CYKCVAEAGA PAGRNNDGSS APTPKDCKLI
421 VRVPAGADGRV TSGFDPVSLT GPLSYHPSSY GASYPNPSNP LHGMPPKPNV VRPPPPGFHP
481 SVIPNPPYPL GTPAGMPQPE VPPLQHPPPT GSPPAAAPQP PYPVGTPVMP QPEIPPVHRP
541 PPPGFRPEVA PVPPYPVGTP TGMPQPEIPA VHHFPYVTT TTTAADLGTD DDDKSPGFSS
601 TMAISDPNSS SVDKLAAALE HHHHHH

```

SAG1-SAG2-ROP1 (SAG1 49-310 AA; SAG2 30-170 AA; ROP1 85-396 AA)

```

1  MHHHHHHSSG LVPRGSGMKE TAAAKFERQH MDSPDPDPPL VANQVVTCPD KKSTAAVILT
61 PTENHFTLKC PKTALTEPPT LAYSPNRQIC PAGTTSSCTS KAVTLSSLIP EAEDSWWTGD
121 SASLDTAGIK LTVPIEKFPV TTQTFVVGCI KGDDAQSCMV TVTVQARASS VVNNVARCSY
181 GADSTLGPVK LSAEGPTTMT LVCGKDGKVK PQDNNQYCSG TTLTGCNEKS FKDILPKLTE
241 NPWQGNASSD KGATLTIKKE AFPAESKSVI IGCTGGSPEK HHCTVKLEFA GAAGSAKSAE
301 TPAPIECTAG ATKTVDAPSS GSVVFQCGDK LTISPSGEGD VFYGKECTDS RKLTTVLPGA
361 VLTAKVQOPA KGPATYTLSY DGTPEKPQVL CYKCVAEAGA PAGRNNDGSS APTPKDCKLI
421 VRVPAGADGRV TSGFDPVSLT PVRGPDQVPA RGEAALVTEE TPAQQPAVAL GSAEGEGTST
481 TESASENSED DDTFHDALQE LPEDGLEVRP PNAQELPPPN VQELPPPTEQ ELPPSTEQEL
541 PPPVGEGQRL QVPGEHGPQG PPYDDQQLL EPTEEQQEGP QEPLPPPPPP TRGEQPEGQQ
601 PQGPVRQNFF RRALGAARS FGGARRHVSG VFRRVRGGLN RIVGGVRS GF RRAREGVVGG
661 VRRLTSGASL GLRRVGEGLR RSFYRVRGAV SSGRRRAADG ASNVRRERFVA AGGRVRDAFG
721 AGLTRLRRRG RTNGEEGRPL LGEGREQDDG SQDLGTDDDD KSPGFSSTMA ISDPNSSSV
781 KLAAALEHHH HHH

```
