# Supplementary material for: El mensaje liberador de Dioniso en las Bacantes de Eurípides
Source: MDPI journal article supplement (doi:10.3390/ijms25084384), 2004-01-01

**Gel A**

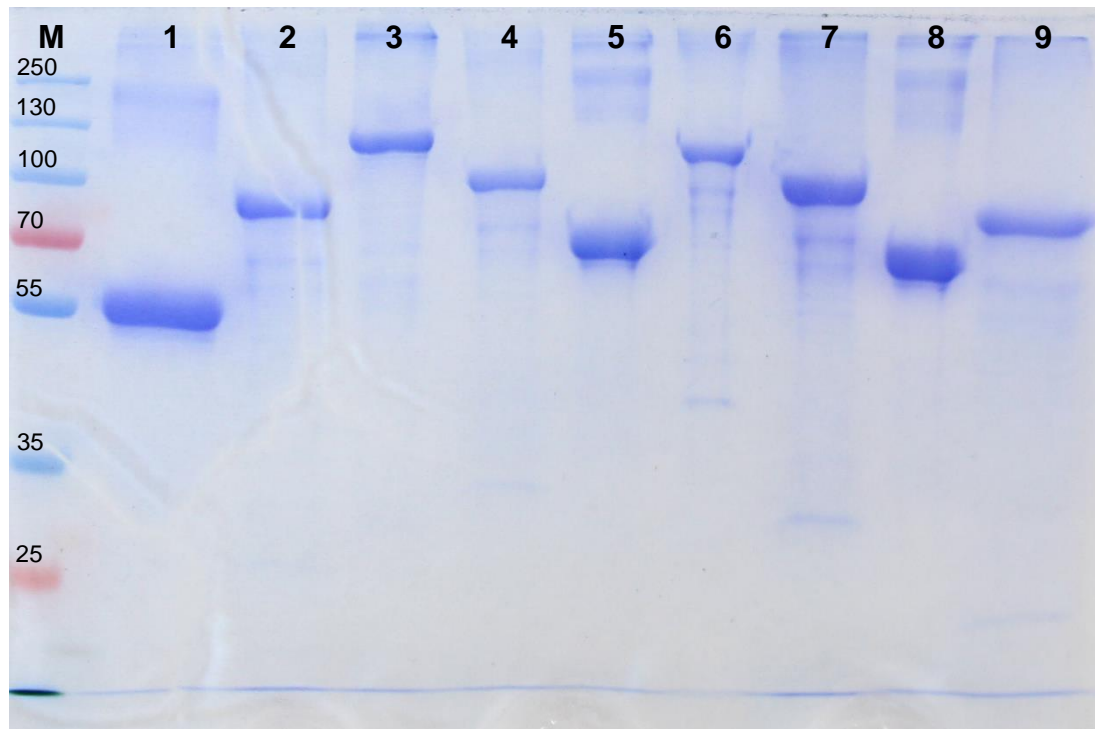

**Gel B**

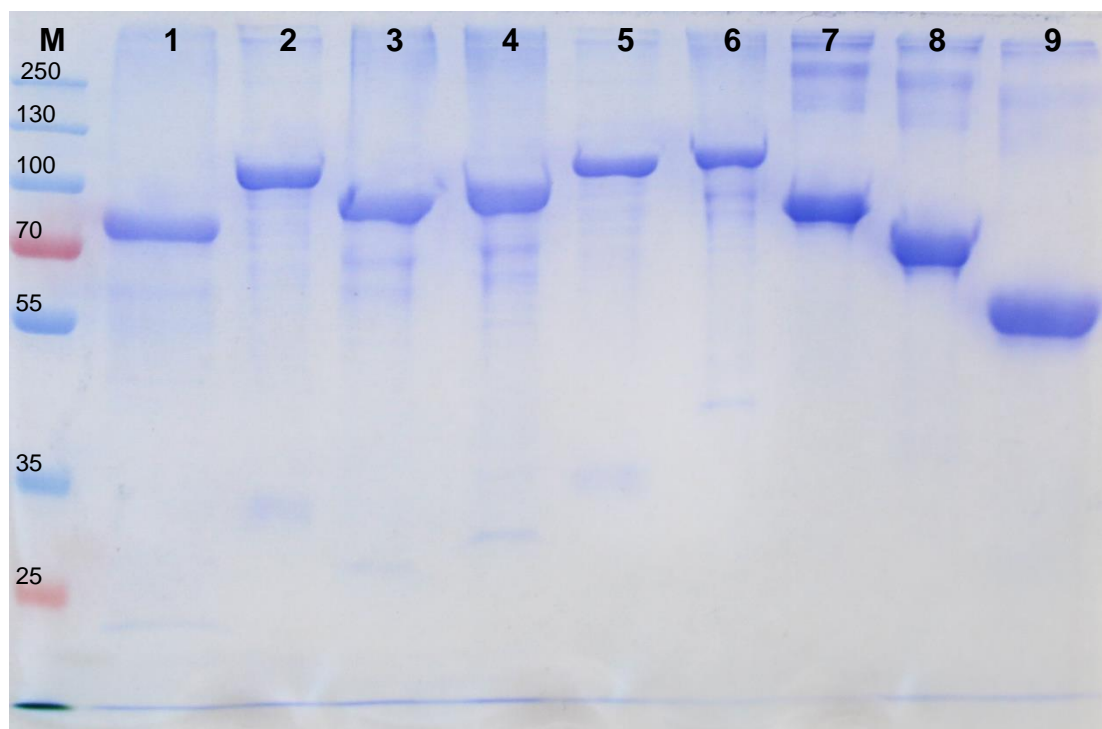

**Figure S7.** Coomassie blue-stained SDS-PAGE (10% polyacrylamide gel) separation of purified recombinant chimeric proteins.

**Gel A lines:**

M – PageRuler™ Plus Prestained Protein Ladder (Thermo Fisher Scientific, Waltham, MA, USA)

1 – SAG1-SAG2

2 – SAG1-SAG2-MAG1S

3 – SAG1-SAG2-MIC1

4 – SAG1-SAG2-GRA9

5 – SAG1-SAG2-P35S  
6 – SAG1-SAG2-P35  
7 – SAG1-SAG2-GRA7  
8 – SAG1-SAG2-GRA2  
9 – SAG1-SAG2-GRA1

**Gel B lines:**

M – PageRuler™ Plus Prestained Protein Ladder (Thermo Fisher Scientific, Waltham, MA, USA)

1 – SAG1-SAG2-GRA6  
2 – SAG1-SAG2-MAG1  
3 – SAG1-SAG2-ROP1  
4 – SAG1-SAG2-LDH2  
5 – SAG1-SAG2-AMA1S  
6 – SAG1-SAG2-AMA1C  
7 – SAG1-SAG2-MIC3  
8 – SAG1-SAG2-MIC1ex2  
9 – SAG1-SAG2-GRA5

Additionally, we attach uncropped photos of the gels.

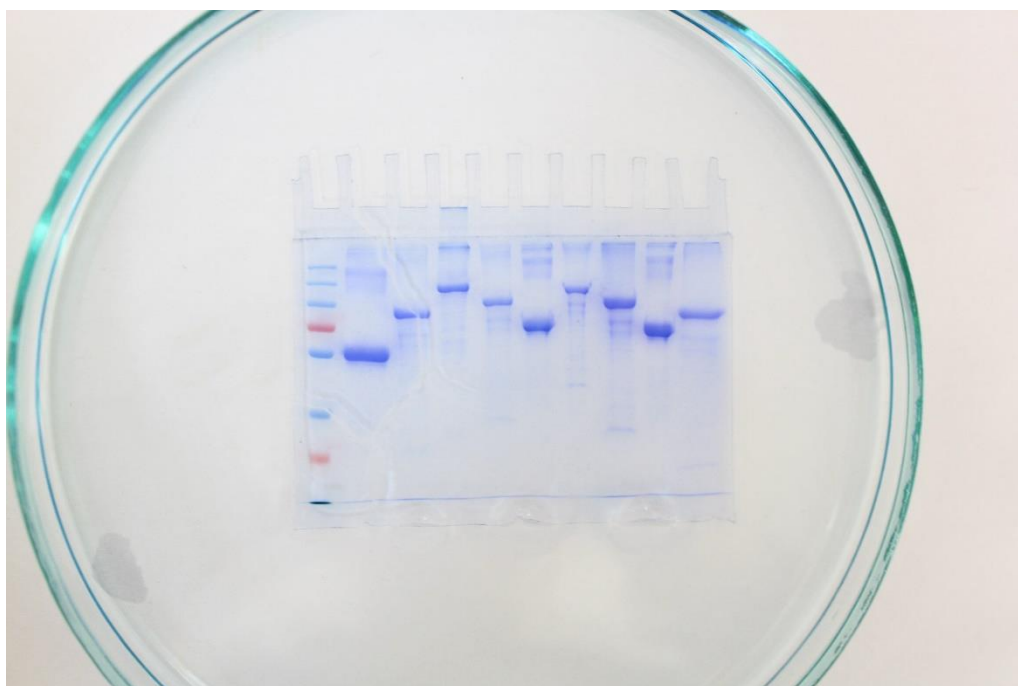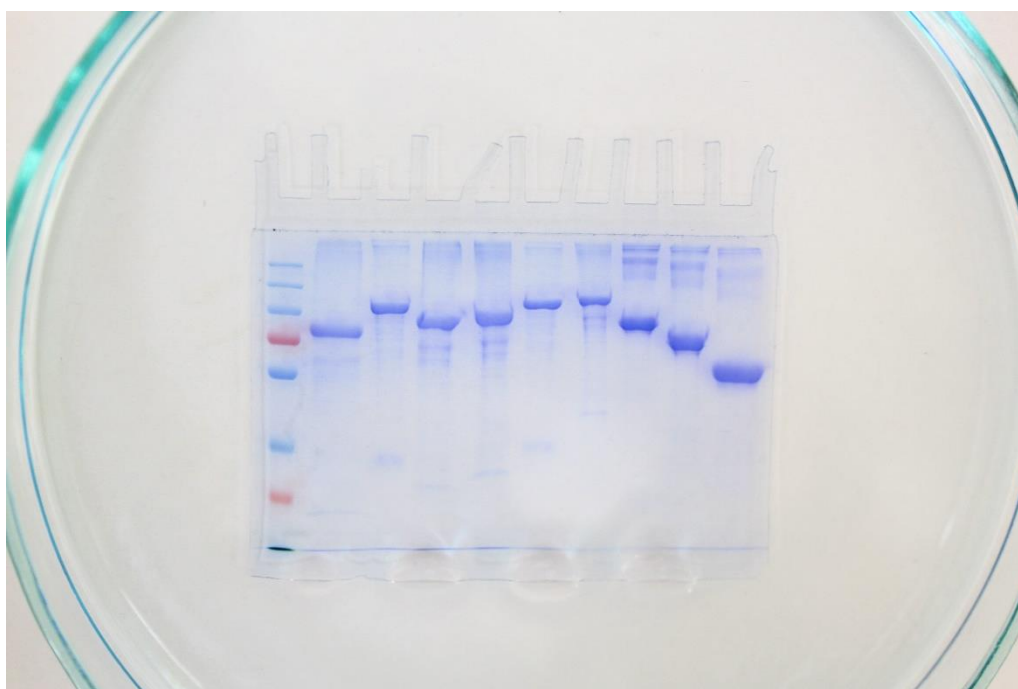

Supplement: s1 [file s1]
